# Supplementary material
Source: bioRxiv or medRxiv preprint supplement (https://www.biorxiv.org/highwire/filestream/6178/field_highwire_adjunct_files/0/001016-1.pdf)
Supplement: Supplementary file [file 001016-1.pdf]

1

2 **Contents**

3 **1 Fisher’s Geometric Model Simulations** **2**

4 1.1 FGM models . . . . . 2

5 1.2 Implementation of simulations . . . . . 4

6 1.3 Partitioning walks . . . . . 5

7 1.4 Computing whether a set of alleles generates a stable equilibrium . . . . . 6

8 1.5 Identification of hidden alleles . . . . . 6

9 **2 Backward Predictability Inference** **6**

10 2.1 Computing the likelihood of a particular order of mutations . . . . . 7

11 2.2 Testing the accuracy of the backward predictability inference methods . . . . 12

12 2.3 Quantifying backward predictability . . . . . 12

13 2.4 Phenotypic similarity of inferred trajectories from backward predictability

14 inference . . . . . 13

15 2.5 Maximum distance of observed trajectory from the optimal trajectory as a

16 metric of forward predictability . . . . . 14

17 2.6 Example of backward predictability inference . . . . . 14

18 **3 Supplementary Figures** **21**

# 1 Fisher's Geometric Model Simulations

We model adaptive walks in sexual diploid populations with Wright-Fisher simulations using Fisher's geometric model (FGM) as in SELLIS *et al.* (2011). FGM is a phenotypic model, where the phenotype is represented as a point in n-dimensional coordinate space. We assume phenotypes are additive, such that the phenotype of a diploid individual is the midpoint of the phenotypes of the constituent alleles (SELLIS *et al.* 2011). Note that this does not assume that alleles are additive in fitness space. Mutations in this system are vectors that modify the phenotype of the allele.

Since FGM is a phenotypic model, the underlying genetic basis for the mutations is not explicitly defined. For the purposes of this work, we will assume that there is a large number of completely linked loci underlying the phenotype, resulting in an infinite alleles model with no recombination. Each phenotypic mutation vector could be thought of as representing a mutation at a unique locus in this underlying genotype space, analogous to different functional mutations in a single gene.

## 1.1 FGM models

We explore three different parameterizations of FGM. In all parameter regimes, the population initially contains a single allele with a distance of 2 units from the optimum. The first two regimes use a symmetrical Gaussian fitness landscape with a single phenotypic optimum at the origin of the form

$$w(x) = e^{-x^2/2} \tag{1}$$

in two and 25 phenotypic dimensions, respectively, where  $x$  is the distance of the

39 individual's phenotype to the optimum. The mutation rate is set to  $\mu = 5 * 10^{-6}$ , which  
40 results in one mutation every 20 generations on average with a diploid population of size  
41  $N = 5000$ . Mutations are vectors in phenotype space that get added to the phenotypic  
42 position of the underlying allele to generate a new allele. The angle of the mutation vector  
43 is drawn from a spherically uniform distribution, while the magnitude of the mutation  
44 vector is drawn from an exponential distribution. For the two dimensional regime, the  
45 mean of the mutational magnitude is 0.5, while for the 25 dimensional regime, the mean is  
46 set to 5. The mutational magnitudes were chosen to generate sufficient numbers of  
47 adaptive walks both with and without overdominant mutations.

48 We are forced to use a larger mutational magnitude for the 25 dimensional regime, as the  
49 magnitude of the component of the mutation vector in the direction of the phenotypic  
50 optimum becomes smaller when the number of dimensions increases. Once this component  
51 becomes too small, most mutations are nearly neutral in fitness effect and are mostly lost  
52 from the population. Thus, without increasing the mutational magnitude to compensate  
53 for this effect, it would be impossible for us to generate adaptive trajectories of sufficient  
54 length for our analysis. Despite this correction, we still had trouble sampling a sufficient  
55 number of trajectories without overdominant mutations for our statistics, as the fraction of  
56 adaptive mutations that are overdominant increases with increasing dimensionality under  
57 phenotypic additivity (SELLIS *et al.* (2011), Figure S2), so we had to run additional  
58 simulations until we obtained another 200 simulations with at least 5 adaptive mutations  
59 that did not contain any balanced states.

60 The third parametrization of FGM is another two-dimensional landscape with a different  
61 Gaussian fitness function. The Gaussian fitness surface was first used by LANDE (1976)  
62 under an assumption that the population is initially close enough to the optimum to be  
63 adapting under a concave-down surface (fitness increases at a slower rate as the phenotype

64 approaches the optimum). In our original simulations, the initial population is in a  
65 concave-up portion of the fitness surface, so we conducted further simulations with the  
66 above fitness function to ensure that the shape of the local fitness surface did not have a  
67 qualitative impact on our results. These additional simulations in two dimensions are  
68 conducted with:

$$w(x) = e^{-x^2/18} \tag{2}$$

69

70 This parametrization is chosen such that the initial population, at distance 2 from the  
71 optimum, is in the concave-down portion of the Gaussian curve and thus close to the  
72 optimum. The remainder of the parameters ( $\mu$ ,  $N$ , and mutational magnitude) are identical  
73 to the previous two-dimensional regime.

## 74 **1.2 Implementation of simulations**

75 The simulations use the code modified from SELLIS *et al.* (2011) to allow for more than 2  
76 dimensions. We perform 10,000 replicate simulations using a standard Wright-Fisher  
77 approach (FISHER 1930; WRIGHT 1931) . Simulations are conducted for 10,000  
78 generations, where each generation consists of mutating alleles and then propagating alleles  
79 to the next generation. For propagation, all possible offspring genotypes are computed and  
80 assigned a weight proportional to their frequency (assuming that all offspring genotypes are  
81 in Hardy-Weinberg equilibrium based on the allele frequencies of the previous generation)  
82 multiplied by the fitness of the diploid offspring genotype. We then conduct multinomial  
83 sampling over these weighted offspring genotypes to determine the frequencies of the alleles

84 in the next generation (i.e., viability selection on the offspring). Complete source code is  
85 available at <https://github.com/sunthedeeep/Fisher-Geometric-Model>.

86 To conduct backward predictability inference, we identify the most frequent allele in each  
87 simulated population at the end of 10,000 generations of evolution and study the mutations  
88 present on that allele. We limit our analysis to studying the first five mutations of each  
89 adaptive walk and ignore simulations with fewer than five mutations in order to control for  
90 the length of the adaptive walk when studying predictability. We partition our  
91 five-mutation adaptive walks into those that do and those that do not contain  
92 overdominant mutations to study the impact of balanced states on predictability.

### 93 **1.3 Partitioning walks**

94 Throughout all of our analysis, we have separated walks with and without overdominant  
95 mutations. The methodology for this separation is as follows. For each FGM simulation,  
96 we have identified the most frequent allele at the end of the simulation, and isolated the  
97 first five mutations to occur on this allele. We first determine the time  $t_5$  at which the  
98 allele containing these first five mutations exceeded 5% frequency in the population. All  
99 time-points after  $t_5$  are no longer considered for analysis. At each generation  $t \leq t_5$ , we  
100 isolate all alleles in the population at  $\geq 1\%$  frequency. For every subset of these alleles,  
101 we compute their equilibrium frequencies and mean fitness using the method of KIMURA  
102 (1956) (ST1.4). If a set of alleles generates a stable polymorphic state at equilibrium, we  
103 infer that there is an overdominant mutation present among those alleles. An FGM  
104 simulation is determined to contain an overdominant mutation if, for any generation  
105  $t \leq t_5$ , the subset of alleles with the highest mean fitness at generation  $t$  is a stable  
106 polymorphism at equilibrium. For simplicity, we removed simulations that contained stable  
107 polymorphisms with  $\geq 3$  alleles for  $\geq 50$  generations so that we only need to consider 2  
108 allele balanced states for the remainder of this work.

## 1.4 Computing whether a set of alleles generates a stable equilibrium

The method of KIMURA (1956) generates a square fitness matrix  $A$  of size  $n$ , where  $n$  is the number of alleles present at the locus at non-zero frequency. The value of  $A_{i,j}$  (row  $i$ , column  $j$  of matrix  $A$ ) is the fitness of the genotype containing alleles  $i$  and  $j$ . The system of alleles is stable if: 1) by replacing each column of  $A$  with 1's and computing the determinant of the resulting matrix, the sign of the determinant is always positive and 2) the matrix  $T$ , where  $t_{i,j} = A_{i,j} - A_{i,n} - A_{j,n} + A_{n,n}$ , must be negative definite. The frequencies of each allele and mean fitness can also be computed from these matrices. For a further discussion of computing the stability of a balanced system, please see KOJIMA (1959); MANDEL (1959); KINGMAN (1961).

## 1.5 Identification of hidden alleles

We identify hidden alleles (Figure 4b) by comparing the set of alleles present in the equilibrium state of each generation throughout a given FGM simulation from ST1.3 to the set of 5 alleles along the direct mutational trajectory from the ancestral allele to the 5-mutant allele (i.e. the 0, 1, 2, 3, 4 and 5- mutant alleles). Any allele that is present in the equilibrium states, but not part of the mutational trajectory of the 5-mutant allele, is deemed a hidden allele.

## 2 Backward Predictability Inference

Backward predictability inference seeks to reconstruct the order in which a set of mutations arose in an adaptive trajectory. By estimating the likelihood of every possible order, we can try to predict the “true” adaptive trajectory as the inferred trajectory with the highest probability. We can also study the probability distribution of all of the possible adaptive trajectories to understand how predictable the system is overall.

133 Experimental studies conducting backward predictability inference assumed a strong  
134 selection / weak mutation (SSWM) model of evolution (WEINREICH *et al.* 2006), which we  
135 also use in our study. With the SSWM assumption, the population is assumed to reach  
136 equilibrium after the successful invasion of each mutation before the next mutation is  
137 introduced. This is appropriate as our per-generation mutation rate of 0.05 is much smaller  
138 than one. For simplicity of analysis. we also assume that all balanced states contain  
139 exactly two alleles, as we have excluded all simulations that generated balanced states with  
140 3 or more alleles.

141 We utilize two variants of the backward predictability inference method. The first, which  
142 we call the fixation assumption method (FA method), assumes that every mutation that  
143 successfully invades the population reaches fixation, and is comparable to the method of  
144 WEINREICH *et al.* (2006). The second, which we call the polymorphism assumption  
145 method (PA method), allows for the presence of stable two-allele polymorphic states.

146 We conduct backward predictability inference within the framework of FGM. We explicitly  
147 model the phenotypes of the alleles and mutation vectors, and use the same fitness  
148 functions as in the FGM simulations to compute fitness.

## 149 **2.1 Computing the likelihood of a particular order of mutations**

150 We begin with an overview of the backward predictability inference method used by  
151 WEINREICH *et al.* (2006) and then continue on to a description of our implementation of  
152 the FA and PA methods.

153 **Weinreich et al (2006) inference method** Weinreich et al (2006) describe the  
154 probability of the ancestral allele ( $A^{wt}$ ) evolving into the derived allele containing all 5  
155 mutations available ( $A^{der}$ ) going through a particular order of mutations ( $M_i$ ) with

156 intermediate alleles  $a$ ,  $b$ ,  $c$  and  $d$ . This can be computed as

$$\begin{aligned}\Pr(M_i) &= \Pr(A^{wt} \rightarrow a \rightarrow b \rightarrow c \rightarrow d \rightarrow A^{der}) \\ &= \Pr(A^{wt} \rightarrow a) * \Pr(a \rightarrow b) * \Pr(b \rightarrow c) * \Pr(c \rightarrow d) * \Pr(d \rightarrow A^{der})\end{aligned}\quad (3)$$

157 because “along any particular trajectory the choice of each next fixation is statistically  
158 independent of all previous fixations. Here, the  $\Pr(i \rightarrow j)$  are the conditioned fixation  
159 probabilities of a particular single mutant neighbour  $j$  of an allele  $i$  given by

$$\Pr(i \rightarrow j) = \frac{\Pi_{i \rightarrow j}}{\sum_{k \in N_i} \Pi_{i \rightarrow k}}\quad (4)$$

160 where  $\Pi_{i \rightarrow j}$  is the unconditioned fixation probability of allele  $j$  from allele  $i$ , and  $N_i$  is the  
161 set of all mutational neighbours of allele  $i$ .” (modified from WEINREICH *et al.* (2006)  
162 Supplementary Methods). In essence, (WEINREICH *et al.* 2006) compute the probability of  
163 a particular order of mutations as the product of the probabilities of each mutation in that  
164 order successfully fixing in the population in succession.

165 **The FA and PA methods** Our methods for backward predictability inference are  
166 necessarily more complicated.

167 First, since we are using a diploid model, new mutations occur as heterozygotes and thus  
168 must invade the population as heterozygotes. Therefore, we cannot compute the fixation  
169 probability, but must compute the probability of an allele successfully invading the  
170 population from low frequency and reaching its equilibrium frequency. Secondly, in the  
171 presence of a balanced polymorphism in the PA method, new mutations can occur on  
172 multiple available backgrounds. This allows for the generation of hidden alleles when



173 conducting the PA method. This also implies that it may take more than 5 mutations in a  
174 mutation order to generate the allele with all 5 mutations. Finally, a new mutation in the  
175 PA method that successfully invades can either fix or balance with any of the alleles  
176 already present in the population, whereas a successful invasion by new mutation in the FA  
177 method can only result in fixation. As these properties make it challenging to describe the  
178 FA and PA methods using closed form analytic equations as in WEINREICH *et al.* (2006),  
179 we will describe the recursive algorithm we use to implement the FA and PA methods  
180 using pseudocode. Every call to the algorithm keeps requires a population state (set of  
181 alleles and their frequencies), a set of alleles observed during the recursion and the  
182 probability of the mutation order so far. Using global variables outside of the algorithm, we  
183 keep track of  $\Phi(M_i)$ , the unconditioned probability of every possible mutation order  $M_i$ .  
184 All  $\Phi(M_i)$  are initialized to 0.

---

computeBackwardInference( $S_{existing}$ ,  $A^{existing}$ ,  $P_{existing}$ )

---

1:  $S_{existing} \leftarrow$  the population state = a set of alleles and their frequencies  
2:  $A^{existing} \leftarrow$  the set of alleles observed so far in this mutation order  
3:  $P_{existing} \leftarrow$  the unconditioned probability of this order of mutations so far  
4: **if**  $A^{der} \in S_{existing}$  **then**  
5: We need to first determine the order  $M_i$  in which the mutations were introduced into  $A^{der}$  and add  $P_{existing}$  to the unconditioned probability for this order of mutations ( $\Phi(M_i)$ )  
6: *return* // We are done since we have successfully generated  $A^{der}$   
7: **else**  
8:  $\rho_{total} = 0$   
9: **for all** new alleles  $A^n$  that can be generated by a single mutation on the alleles in  $S_{existing}$ , excluding those where  $A^n \in A_{existing}$  **do**  
10: **for all** pairs of alleles  $A^i, A^j$  in the set of alleles including  $A^n$  and every allele in  $S_{existing}$  **do**  
11: Compute the frequency of  $A^i$  and  $A^j$  and the mean fitness of the population at equilibrium assuming these are the only two alleles in the population  
12:  $S_{new}$  = the pair of alleles and their frequencies with the highest mean fitness computed in the preceding for loop excluding all alleles at frequency 0.  
13: **if**  $A^n \notin S_{new}$  **then**  
14:  $A^n$  cannot invade  $S_{existing}$  and can thus be ignored  
15: **else**  
16: compute  $P_{A^n}^i$  = the probability of invasion of  $A^n$  into  $S_{existing}$  through 10,000 forward Wright-Fisher simulations  
17: The unconditioned probability of  $A^n$  succeeding in this population  $\rho_n = P_{A^n}^i * \text{the frequency of the allele in } S_{existing} \text{ that was mutated to generate } A^n$   
18:  $\rho_{total} += \rho_n$   
19: **for all** new alleles  $A^n$  with  $\rho_n > 0$  **do**  
20:  $S_{new}$  and  $\rho_n$  defined as above for  $A^n$   
21: **if** Using the FA method **then**  
22:  $S_{new} = A^n$  at frequency 1 (fixation)  
23:  $A_{new} = A_{existing} \cup A^n$   
24:  $P_{new} = P_{existing} * \frac{\rho_n}{\rho_{total}}$   
25: computeBackwardInference( $S_{new}$ ,  $A_{new}$ ,  $P_{new}$ ) // recursive call

---

185 The initial call to this algorithm has  $S_{existing}$  be the ancestral population used in the FGM  
 186 simulations i.e. a population monomorphic for an allele two units from the optimum,  
 187  $A_{existing}$  as the set containing  $A^{wt}$  and  $P_{existing} = 1$ . Once we have computed the  
 188 unconditioned probability for every  $M_i$  ( $\Phi(M_i)$ ), we then use this information to compute  
 189 the conditioned probability for each mutation order.

$$\Pr(M_i) = \frac{\Phi(M_i)}{\sum_j \Phi(M_j)} \quad (5)$$

190 Note that we track mutation orders by the order in which the mutations were introduced  
 191 on allele  $A^{der}$ , which is always five mutations long, not the order in which the mutations  
 192 were introduced in the population which is  $\geq 5$  mutations with the PA method but  
 193 always exactly 5 mutations with the FA method.

194 In both the FA and PA methods, we compute the invasion probability of a new mutation  
 195  $P_{A^n}^i$  using 10,000 forward Wright-Fisher simulations. In these simulations, we set  $N =$   
 196 5,000 diploid individuals as in our FGM simulations, with no new mutations allowed.

197 The probability of a new allele successfully invading and reaching the deterministically  
 198 inferred stable equilibrium is then the fraction of Wright-Fisher simulations where  $A^n$   
 199 reaches 90% of its expected equilibrium frequency in  $S_{new}$ . These simulations are entirely  
 200 separate from the FGM simulations used to generate the adaptive walks used throughout  
 201 the rest of this work.

202 We are forced to utilize empirical estimations through simulations and not the classical  
 203 analytic solutions to compute  $P_{A^n}^i$  (HALDANE 1927; KIMURA 1962) as many of the  
 204 observed mutations have a selective advantage exceeding 100%, violating the assumptions  
 205 of the analytic solutions that the mutations are weakly beneficial. Our simulations suggest

206 that the analytic solutions significantly overestimate the invasion probability under these  
207 conditions (data not shown).

## 208 **2.2 Testing the accuracy of the backward predictability inference** 209 **methods**

210 We first test the accuracy of the FA and PA methods by running additional forward FGM  
211 simulations. For each set of 5 mutations observed in one of the original FGM simulations,  
212 we conduct 1000 additional FGM simulations where the only available mutations are these  
213 five. We terminate the simulation either at 10,000 generations or when  $A^{der}$  reaches 5%  
214 frequency in the population, whichever occurs first, and remove from consideration all  
215 simulations where  $A^{der}$  did not occur by 10,000 generations. We estimate  $Pr(M_i)$  as the  
216 fraction of the additional FGM simulations that have mutation order  $M_i$ .

## 217 **2.3 Quantifying backward predictability**

218 To quantitatively study the results of backward predictability inference across simulations,  
219 we define the effective number of paths statistic as

$$\frac{1}{\sum_i Pr(M_i)^2} \quad (6)$$

220 The effective number of trajectories is defined to be 0 when there are no viable trajectories,  
221 e.g.  $\sum_i Pr(M_i)^2 = 0$ . This is similar to the effective number of alleles in a population  
222 (KIMURA and CROW 1964), the predictability metric of ROY (2009) and the entropy  
223 metric of PALMER *et al.* (2013).

224 When a single trajectory dominates the probability density, the effective number of

225 trajectories is close to 1, indicating high backward predictability. On the other hand, if  
226 every trajectory has equal probability,  $Pr(M_i) = \frac{1}{n!}$  since we know that there must be  $n!$   
227 possible mutation orders for a system of  $n$  mutations. In this situation, the effective  
228 number of paths =  $n!$  = total number of possible mutation orders, indicating low backward  
229 predictability. This provides a single metric of the diversity of mutational orders that are  
230 possible while accounting for their relative likelihoods and summarizes the backward  
231 predictability of the adaptive walk. We also use the mean path divergence metric, which  
232 uses the Hamming distance between every pair of viable mutation orders scaled by the  
233 inferred probability of the mutation orders to quantify backward predictability  
234 (LOBKOVSKY *et al.* 2011, 2013) and get consistent results.

## 235 **2.4 Phenotypic similarity of inferred trajectories from backward** 236 **predictability inference**

237 The effective number of paths metric captures the backward predictability of a set of  
238 mutations in terms of the likelihood of observing a given order of mutations. However, we  
239 can also consider the deviation of each of these possible trajectories from the true  
240 trajectory observed in the FGM simulations in phenotype space. In particular, we want to  
241 know if the presence of an overdominant mutation in a simulation influences the  
242 phenotypic similarity of incorrect mutation orders to the true mutation order.

243 We compute a maximum distance metric between the phenotypic states of each inferred  
244 trajectory and the phenotypic states of the true trajectory that were identified in ST1.3,  
245 excluding any inferred trajectory that matches the mutation order of the true trajectory.  
246 We first compute the average phenotype in each trajectory in all generations  $t < t_5$ . We  
247 use the alleles and their frequencies of equilibrium states computed in every generation  
248  $t < t_5$  in section 1.3, and compute the average phenotype of the generation as the midpoint  
249 of the phenotypes of every genotype weighted by their frequencies at Hardy-Weinberg

250 equilibrium. We compute the largest distance from any phenotype in the alternative  
251 mutation order to the phenotypes of the true adaptive trajectory. We then average all of  
252 these phenotypic distances for all inferred trajectories to compute the average phenotypic  
253 distance statistic. We also conduct randomized trials where we randomly select a viable  
254 inferred trajectory as the true trajectory and redo the analysis.

## 255 **2.5 Maximum distance of observed trajectory from the optimal** 256 **trajectory as a metric of forward predictability**

257 For every forward FGM simulation, we compute the average phenotype of the population  
258 at every generation (the the midpoint of the phenotypes of every genotype present in the  
259 population weighted by their frequencies). We then compute the minimum distance of each  
260 these average phenotypes from the optimal trajectory (the line segment connecting the  
261 ancestral phenotype and optimal phenotype) for each generation  $t < t_5$ , and then take the  
262 maximum of these values as the maximal distance of the observed trajectory from the  
263 optimal trajectory for that particular simulation in a manner similar to the phenotypic  
264 similarity metric used in section 2.4.

## 265 **2.6 Example of backward predictability inference**

266 As a concrete example of how backward predictability inference is conducted, we will use a  
267 system of two mutations,  $m_1$  and  $m_2$ . Let  $A^{wt}$  be the ancestral allele,  $A^1$  be the allele  
268 containing mutation  $m_1$ ,  $A^2$  be the allele with  $m_2$  and  $A^{1,2} = A^{der}$  be the the derived allele  
269 containing both available mutations  $m_1$  and  $m_2$ .

270 There are  $2! = 2$  different orders of mutations that can generate allele  $A^{der}$ . In the  
271 mutation order under consideration,  $m_1$  occurs first, then  $m_2$ :

272  $M_1 = A^{wt} \xrightarrow{m_1} A^1 \xrightarrow{m_2} A^{der}$

273 the remaining mutation order is:

274  $M_2 = A^{wt} \xrightarrow{m_2} A^2 \xrightarrow{m_1} A^{der}$

275 Let us first consider the FA method, using example data in Table S1, the results of which  
 276 are shown in Figure S11. Using our recursive procedure, we start with  $S_{existing} = A^{wt}$  at  
 277 fixation. There are two possible mutations in this population, where  $m_1$  occurs on  $A^{wt}$  to  
 278 get  $A^1$  and where  $m_2$  occurs on  $A^{wt}$  to get  $A^2$ . We compute the unconditioned probability  
 279 of allele  $A^1$  successfully being generated and invading the population,  $\rho_{A^1}$  on  $S_{existing}$  and  
 280 similarly for  $A^2$ . These are 0.3 and 0.5, respectively. We then compute the conditioned  
 281 probabilities of success for these alleles. For  $A^1$ , this is  $\frac{0.3}{0.3+0.5} = 0.375$ , while it is  
 282  $\frac{0.5}{0.3+0.5} = 0.625$  for  $A^2$  (Table S1). In essence, a single successful mutation in  $S_{existing}$  ( $A^{wt}$   
 283 fixed in the population) will generate an  $S_{new}$  of  $A^1$  fixed in the population 0.375 of the  
 284 time, and an  $S_{new}$  of  $A^2$  fixed in the population 0.625 of the time. From here, we can then  
 285 do the recursive call for the next step of the inference procedure for each of these new  
 286 population states. These two recursive calls will be: 1)  $S_{new} = A^1$  fixed in the population,  
 287 with  $A_{new} = A^{wt}, A^1$  and  $P_{new} = 1 * 0.375 = 0.375$  and 2)  $S_{new} = A^2$  fixed in the  
 288 population, with  $A_{new} = A^{wt}, A^2$  and  $P_{new} = 1 * 0.625 = 0.625$

289 Let us now consider the first of these recursive calls, when  $A^1$  is the first successful allele to  
 290 invade the population and  $P_{existing}$  for this call is 0.375. In this case, there is only one  
 291 available mutation,  $m_2$ , which will generate the fully adapted allele  $A^{der}$  with an  
 292 unconditioned probability of 0.6 but a conditioned probability of 1. We now have  $S_{new} =$   
 293  $A^{der}$  fixed in the population, with a  $P_{new}$  of  $0.375 * 1 = 0.375$ . We then call the recursive  
 294 condition again with this new  $S_{new}$ , where we find that the termination condition of having  
 295  $A^{der}$  in  $S_{existing}$  has been reached. Therefore, we are done, and the unconditioned

296 probability of the mutation order used to get  $A^{der}$  this time, namely  $A^{wt} \xrightarrow{m_1} A^1 \xrightarrow{m_2} A^{der}$  is  
297 0.375.

298 A similar procedure with the other initial recursive call, where  $m_2$  was the first mutation,  
299 finds that the unconditioned probability of the mutation order  $A^{wt} \xrightarrow{m_2} A^2 \xrightarrow{m_1} A^{der}$  is  
300 0.625. Therefore, we find two viable orders of mutations, one with conditioned probability  
301  $\frac{0.375}{0.375+0.625} = 0.375$  and one with probability  $\frac{0.625}{0.375+0.625} = 0.625$ . Note that with the FA  
302 method, the conditioned probability for a mutation order always equals its unconditioned  
303 probability since the number of mutations introduced into the population is always equal  
304 to the number of mutations in the mutation order. This is not the case in the PA method,  
305 as we will see below.



306 **Table S1**

| $S_{existing}$ | Mutation          | New Allele $A^n$ | Invasion Prob $P_{A^n}^i$ | $\rho_n$ | $P_{existing}$ | $P_{new}$ | $S_{new}$            | Mutation Order for Adapted Allele $A^{der}$              |
|----------------|-------------------|------------------|---------------------------|----------|----------------|-----------|----------------------|----------------------------------------------------------|
| $A^{wt}$       | $m_1$ on $A^{wt}$ | $A^1$            | 0.3                       | 0.3      | 1              | 0.375     | $A^1$ , freq = 1     |                                                          |
| $A^{wt}$       | $m_2$ on $A^{wt}$ | $A^2$            | 0.5                       | 0.5      | 1              | 0.625     | $A^2$ , freq = 1     |                                                          |
| $A^1$          | $m_2$ on $A^1$    | $A^{der}$        | 0.6                       | 0.6      | 0.375          | 0.375     | $A^{der}$ , freq = 1 | $A^{wt} \xrightarrow{m_1} A^1 \xrightarrow{m_2} A^{der}$ |
| $A^2$          | $m_1$ on $A^2$    | $A^{der}$        | 0.2                       | 0.2      | 0.625          | 0.625     | $A^{der}$ , freq = 1 | $A^{wt} \xrightarrow{m_2} A^2 \xrightarrow{m_1} A^{der}$ |

308 We then turn to the PA method, using a different pair of mutations with example data in  
 309 Table S2 and the results in Figure S12. In this case, let us suppose that the  $A^1$  can  
 310 successfully invade the ancestral population consisting of  $A^{wt}$  to result in a balanced state  
 311 consisting of  $A^1$  and  $A^{wt}$  at intermediate frequencies. Meanwhile,  $A^2$  can also successfully  
 312 invade the ancestral population, but it fixes, resulting in  $S_{new}$  consisting of  $A^2$  at frequency  
 313 1. Given their relative invasion probabilities and the fact that  $A^{wt}$  was initially fixed, we  
 314 find that the conditioned probability of  $A^1$  invading  $A^{wt}$  and resulting in a balanced state  
 315  $= 1$  (freq of  $A^{wt}$ ) \* 0.2 (invasion probability of  $A^1$ ) / (1 \* 0.2 + 1 \* 0.35) = 0.36, while the  
 316 probability of  $A^2$  being the next mutation in  $A^{wt}$  is 0.64.

317 For the next recursion step, let us consider the  $S_{existing}$  of  $A^1$  and  $A^{wt}$  at intermediate  
 318 frequencies. There are two possible mutations in this scenario, in which mutation  $m_2$  can  
 319 occur on either  $A^1$  or  $A^{wt}$  to generate alleles  $A^{der}$  and  $A^2$ , respectively. The successful  
 320 invasion of  $A^2$  results in a  $S_{new}$  containing a balanced state consisting of both  $A^1$  and  $A^2$ .  
 321 The new allele  $A^{der}$  can also successfully invade the population and results in a stable  
 322 polymorphism as well. Mutation  $m_1$  is not allowed to occur on  $A^{wt}$ , since that would  
 323 regenerate allele  $A^1$  which has already been observed in this trajectory so far. The  
 324 conditioned probability of  $A^2$  succeeding in this population is  $\frac{0.7*0.14}{0.7*0.14+0.3*0.6} = 0.35$ , while  
 325 the conditioned probability of  $A^{der}$  succeeding is 0.65. The running probability of these two  
 326 mutation orders after two mutations have been introduced in the population are  
 327  $0.36 * 0.35 = 0.126$  and  $0.36 * 0.65 = 0.234$ , respectively.

328 Now let us consider the mutations on the  $S_{existing}$  where both  $A^1$  and  $A^2$  exist as a  
 329 balanced polymorphism. In this situation, there are two possible mutations, where  $m_1$  can  
 330 arise on  $A^2$  to give the adapted allele  $A^{der}$ , and  $m_2$  can arise on  $A^1$  to also give the adapted  
 331 allele  $A^{der}$ . Even though this is the same allele being generated by the two mutations, the  
 332 initial frequency of  $A^1$  and  $A^2$  are different, giving rise to different unconditioned

333 probabilities of their occurrence. The  $m_1$  mutation has a conditioned probability of  
 334  $\frac{0.8*0.4}{0.8*0.4+0.2*0.4} = 0.8$ , while the  $m_2$  mutation has a conditioned probability of 0.2. The  
 335 running probability after each of these mutations are  $0.36 * 0.35 * 0.8 = 0.1008$  and  
 336  $0.36 * 0.35 * 0.2 = 0.0252$ , respectively.

337 The final possible trajectory, where  $m_2$  occurred first on  $S_{existing} = A^{wt}$  and resulted in the  
 338 fixation of  $A^2$  has only one possible mutation. This is mutation  $m_1$  on  $A^2$  resulting in the  
 339 allele  $A^{der}$ . Supposing that  $A^1, 2$  is deleterious in this situation, it cannot invade and  
 340 therefore has 0 probability of occurring. We then terminate this recursion as there are no  
 341 valid beneficial mutations available to this population.

342 Finally, we now need to compute the conditioned likelihoods of each mutation order. We  
 343 managed to successfully get  $A^{der}$  in 3 different ways when considering the mutations  
 344 introduced into the population, but only 2 different ways when considering the mutations  
 345 introduced onto the allele that generated  $A^{der}$ . The unconditioned probabilities of these  
 346 two different mutation orders are:  $0.234 + 0.0252 = 0.2592$  for mutation order  
 347  $M_1 = A^{wt} \xrightarrow{m_1} A^1 \xrightarrow{m_2} A^{der}$  and 0.1008 for mutation order  $M_2 = A^{wt} \xrightarrow{m_2} A^2 \xrightarrow{m_1} A^{der}$ . The  
 348 conditioned probabilities for these two mutation orders are thus  $\frac{0.2592}{0.2592+0.1008} = 0.72$  and  
 349  $\frac{0.1008}{0.2592+0.1008} = 0.28$ , respectively.

350 **Table S2**

| $S_{existing}$                        | Mutation          | $A^n$     | $P_{A^n}^i$ | $\rho_n$ | $P_{existing}$ | $P_{new}$ | $S_{new}$                                 | Mutation Order of $A^{der} \in S_{new}$                  |
|---------------------------------------|-------------------|-----------|-------------|----------|----------------|-----------|-------------------------------------------|----------------------------------------------------------|
| $A^{wt}$                              | $m_1$             | $A^1$     | 0.2         | 0.2      | 1              | 0.36      | $A^1$ freq = 0.3, $A^{wt}$ freq = 0.7     |                                                          |
| $A^{wt}$                              | $m_2$             | $A^2$     | 0.35        | 0.35     | 1              | 0.64      | $A^2$ freq = 1                            |                                                          |
| $A^1$ freq = 0.3, $A^{wt}$ freq = 0.7 | $m_2$ on $A^{wt}$ | $A^2$     | 0.14        | 0.098    | 0.36           | 0.126     | $A^1$ freq = 0.2, $A^2$ freq = 0.8        |                                                          |
| $A^1$ freq = 0.3, $A^{wt}$ freq = 0.7 | $m_2$ on $A^1$    | $A^{der}$ | 0.6         | 0.18     | 0.36           | 0.234     | $A^{der}$ freq = 0.8, $A^{wt}$ freq = 0.2 | $A^{wt} \xrightarrow{m_1} A^1 \xrightarrow{m_2} A^{der}$ |
| $A^1$ freq = 0.2, $A^2$ freq = 0.8    | $m_1$ on $A^2$    | $A^{der}$ | 0.4         | 0.32     | 0.126          | 0.1008    | $A^{der}$ freq = 1                        | $A^{wt} \xrightarrow{m_2} A^2 \xrightarrow{m_1} A^{der}$ |
| $A^1$ freq = 0.2, $A^2$ freq = 0.8    | $m_2$ on $A^1$    | $A^{der}$ | 0.4         | 0.08     | 0.126          | 0.0252    | $A^{der}$ freq = 1                        | $A^{wt} \xrightarrow{m_1} A^1 \xrightarrow{m_2} A^{der}$ |
| $A^2$ freq = 1                        | $m_1$ on $A^2$    | $A^{der}$ | 0           | 0        | 0.64           | 0         | $A^2$ freq = 1                            |                                                          |

352

354 **3 Supplementary Figures**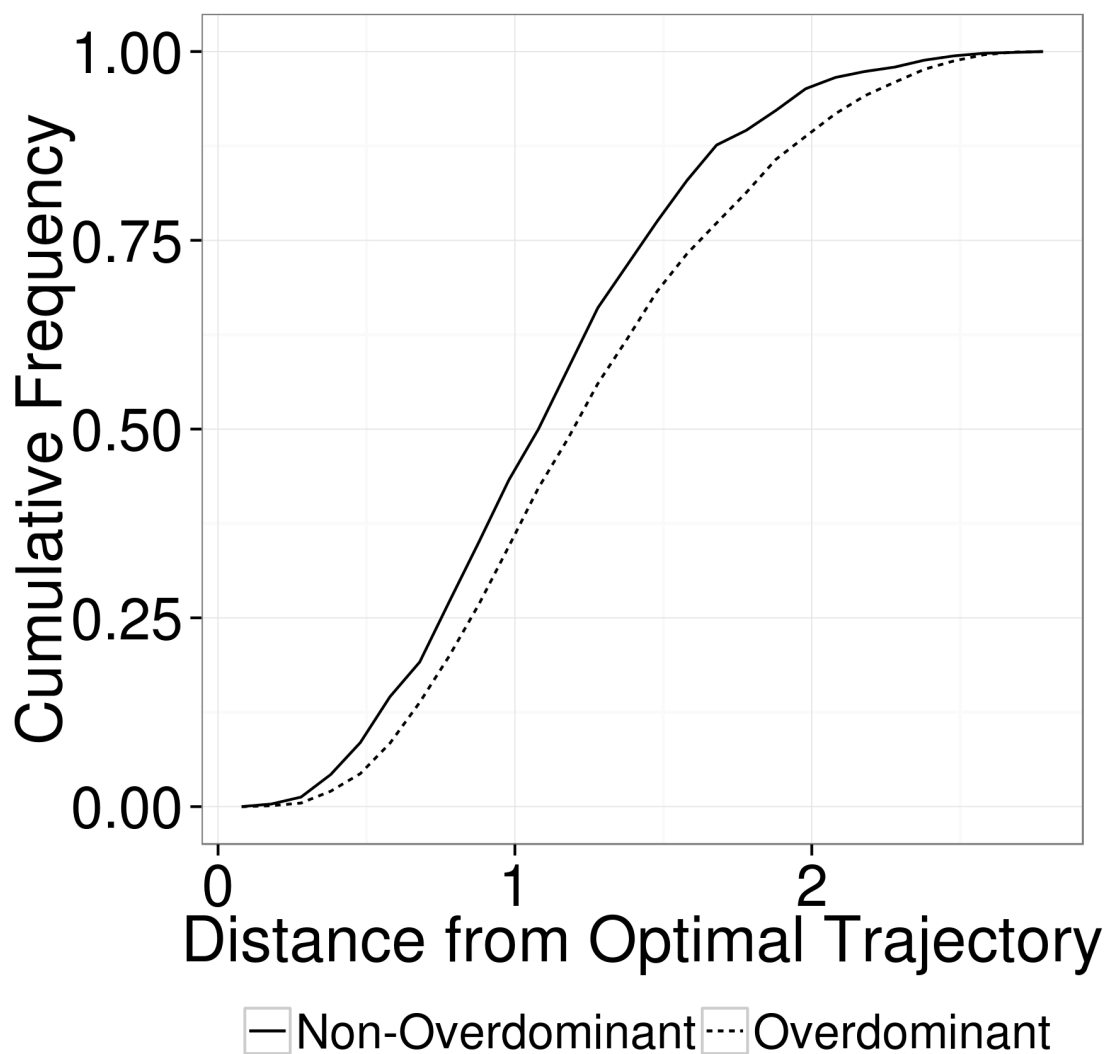

355

356 **Figure S1.** Maximum phenotypic deviation of the initial simulations in 2 dimensions with  
357 and without overdominant mutations from the optimal trajectory. Simulations without  
358 overdominant mutations are significantly closer to the optimal trajectory than those with  
359 overdominant mutations (Kolmogorov-Smirnov  $p = 10^{-7}$ ).

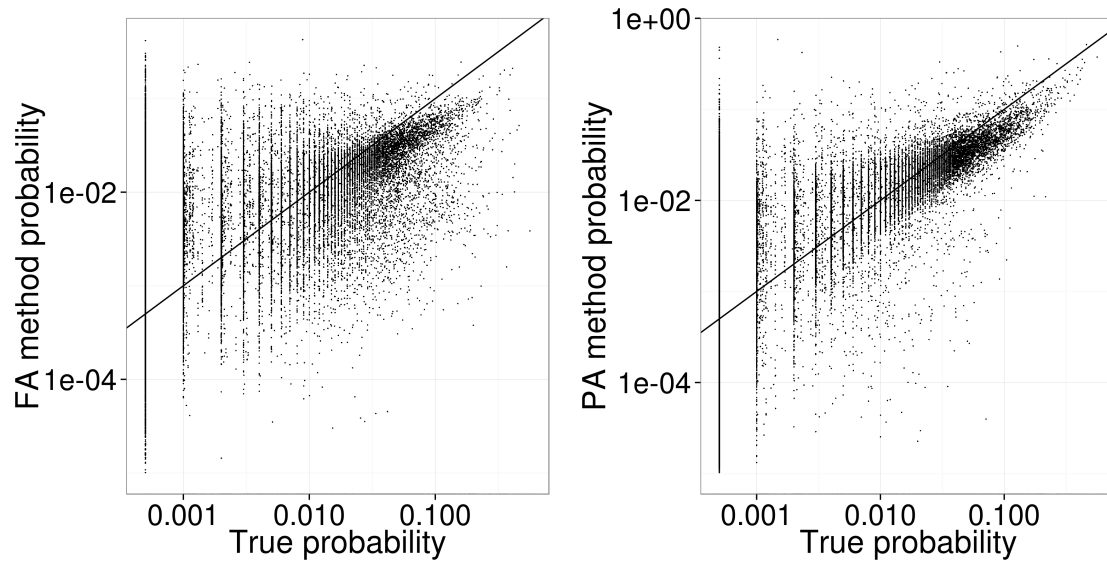

360

361 **Figure S2.** Similar to Figure 1 but for simulations at 25 dimensions. The inferred  
 362 probabilities from both the FA method ( $r^2 = 0.36$ ,  $p < 10^{-10}$ ) and PA method ( $r^2 = 0.65$ ,  
 363  $p < 10^{-10}$ ) are significantly correlated with the true probabilities. The PA method is again  
 364 significantly better correlated than the FA method ( $p < 10^{-10}$ ).

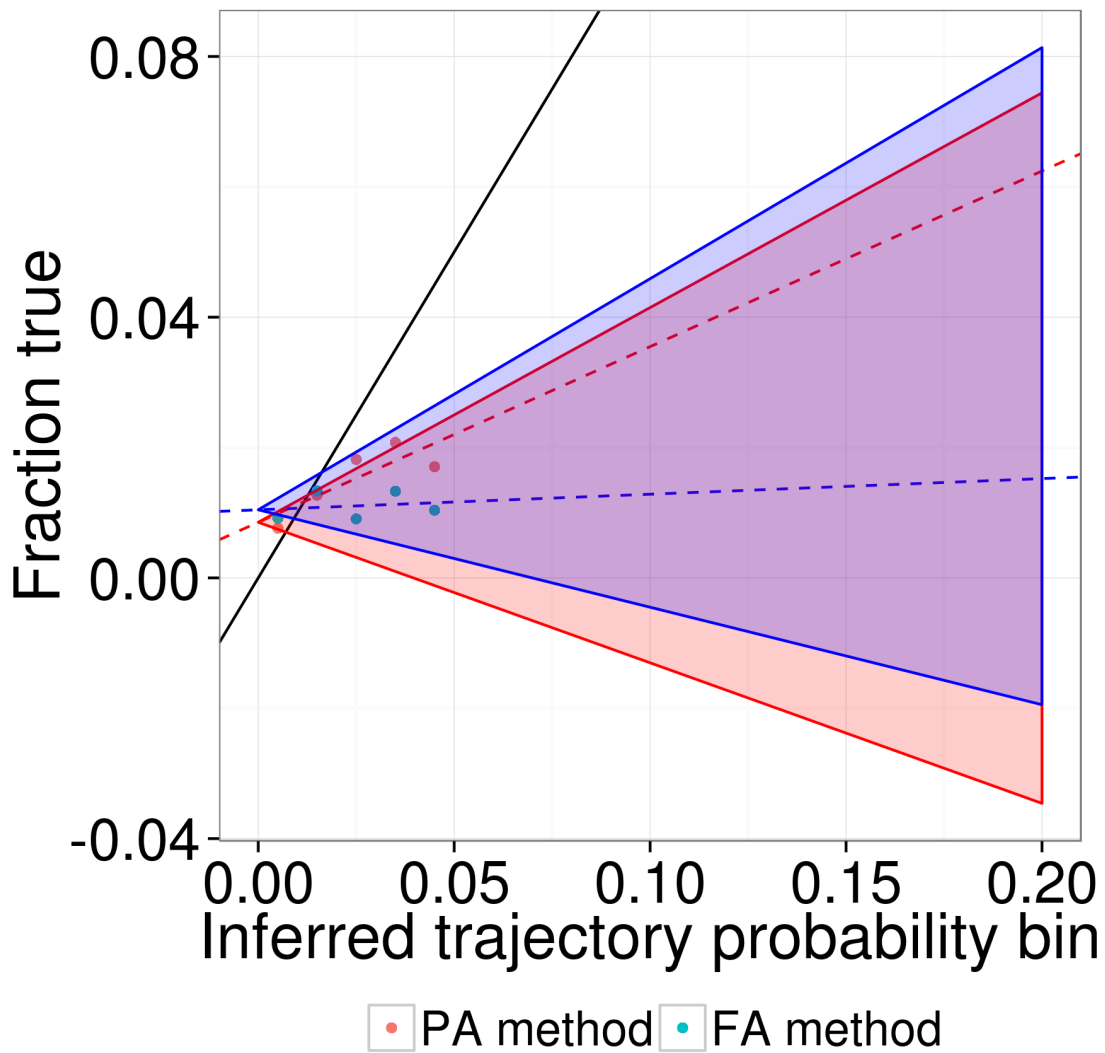

365

366 **Figure S3.** Similar to Figure 2 but for simulations in 25 dimensions. The slope for the FA  
 367 method is not significantly different from the randomized trials (slope = 0.024, empirical  
 368  $p = 0.733$ ), whereas the slope for the PA method is significantly better than all of the  
 369 randomized trials (slope = 0.269, empirical  $p = 0.009$ ).

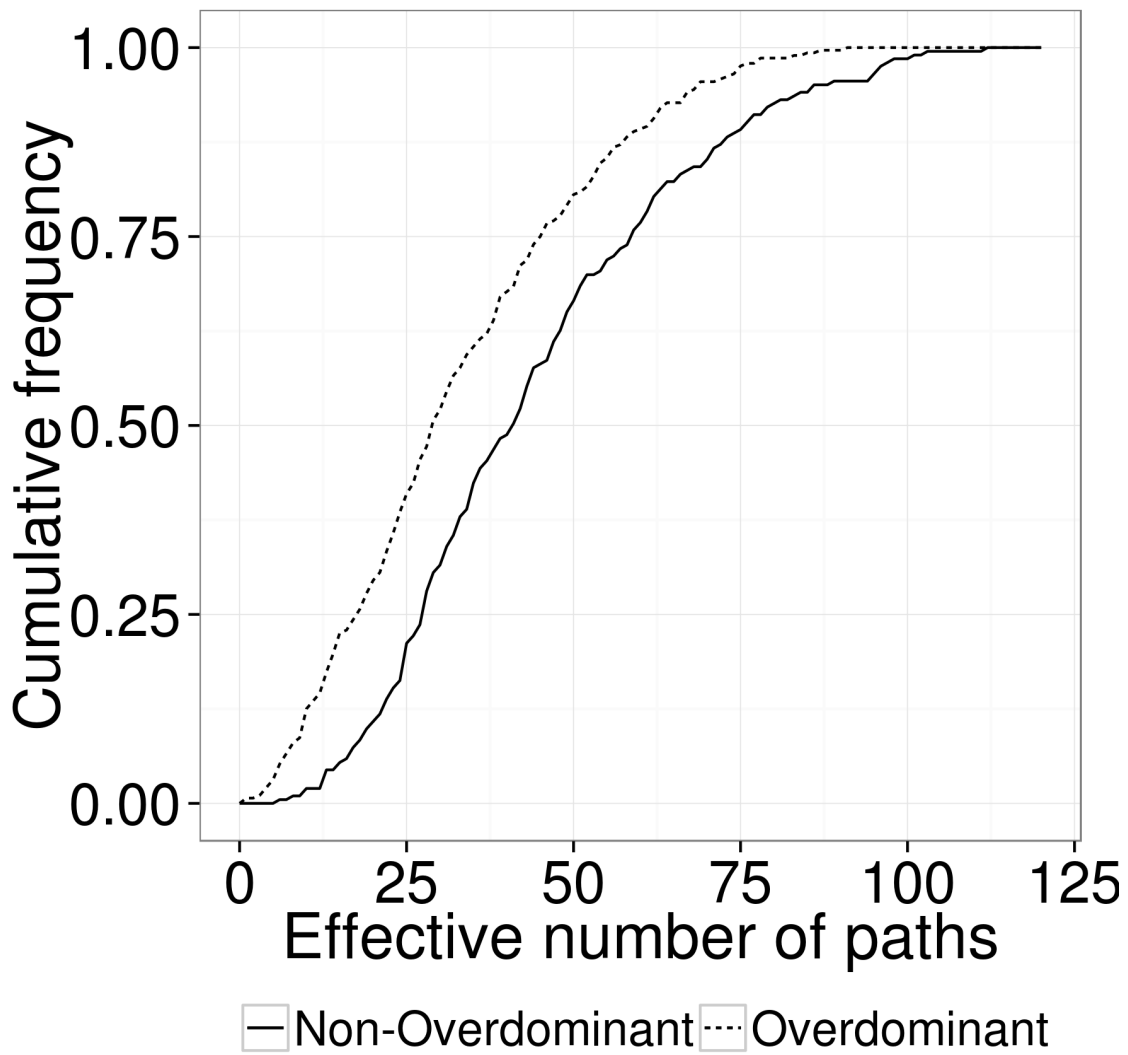

370

371 **Figure S4.** Similar to Figure 3 but for 25 dimension simulations (Kolmogorov-Smirnov

372  $p < 10^{-10}$ ).



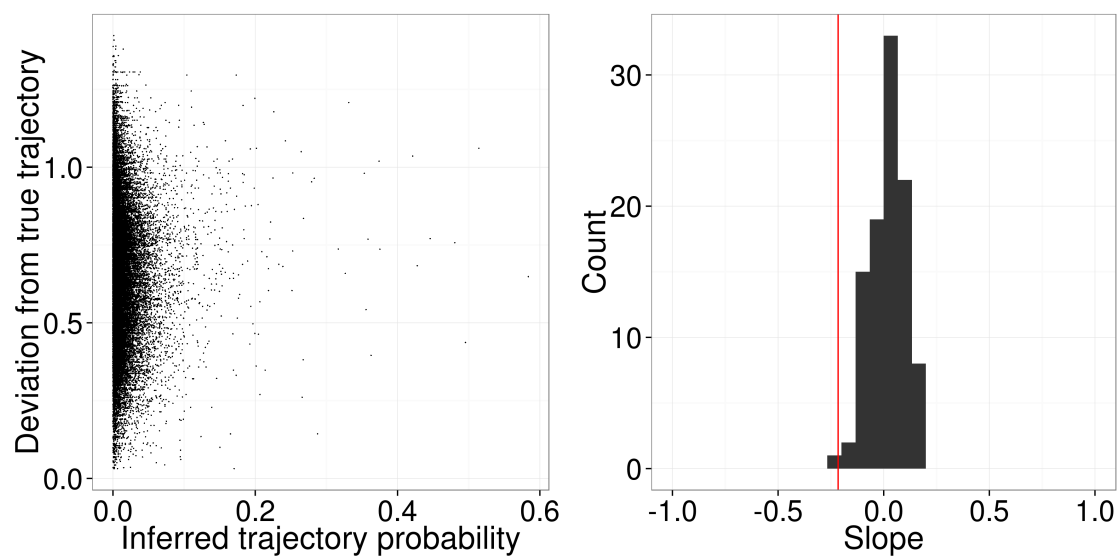

373

374 **Figure S5.** Similar to Figure 4 but for 25 dimension simulations (slope =  $-0.22$ , empirical

375  $p < 0.01$ )

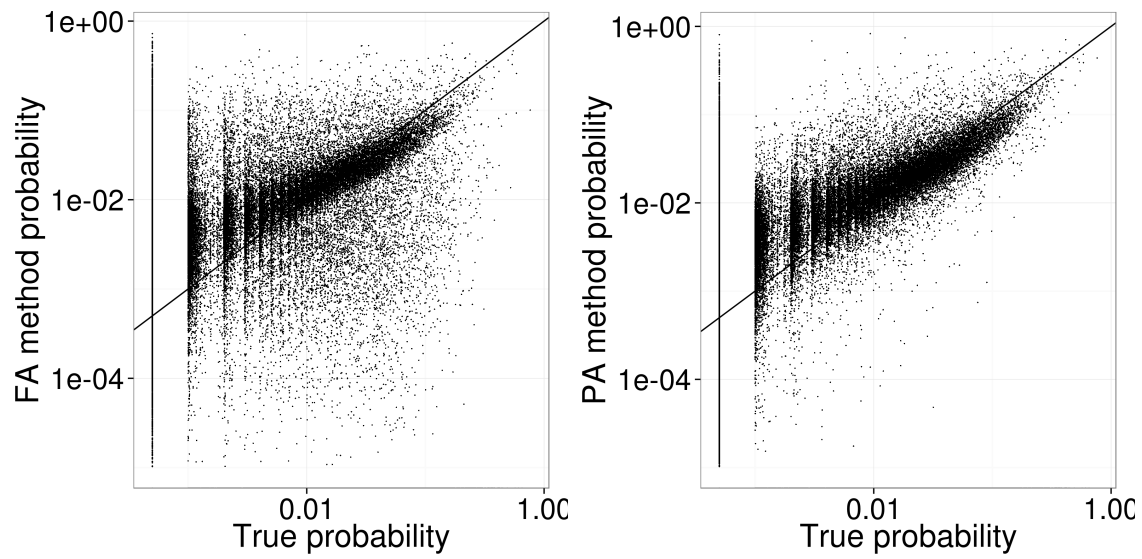

376

377 **Figure S6.** Similar to Figure 1 but for simulations in two dimensions close to the  
 378 optimum. The inferred probabilities from both the FA method ( $r^2 = 0.27$ ,  $p < 10^{-10}$ ) and  
 379 PA method ( $r^2 = 0.52$ ,  $p < 10^{-10}$ ) are significantly correlated with the true probabilities.  
 380 The PA method is again significantly better correlated than the FA method ( $p < 10^{-10}$ ).

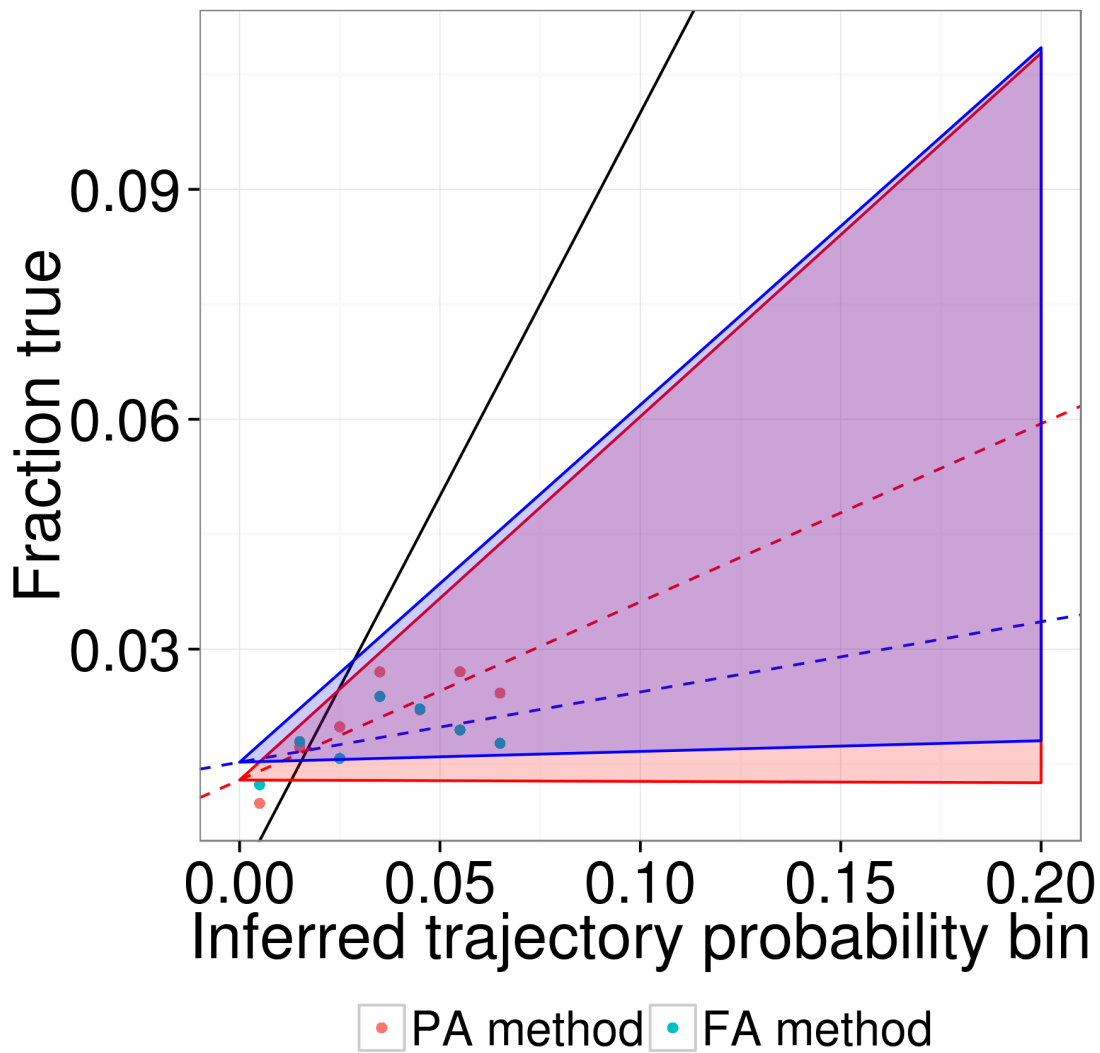

381

382 **Figure S7.** Similar to Figure 2 but for simulations in two dimensions close to the  
 383 optimum. The slopes for both the FA method (slope = 0.092, empirical  $p = 0.968$ ) and the  
 384 PA method (slope = 0.232, empirical  $p = 0.419$ ) are not significantly larger than the  
 385 randomized trials.

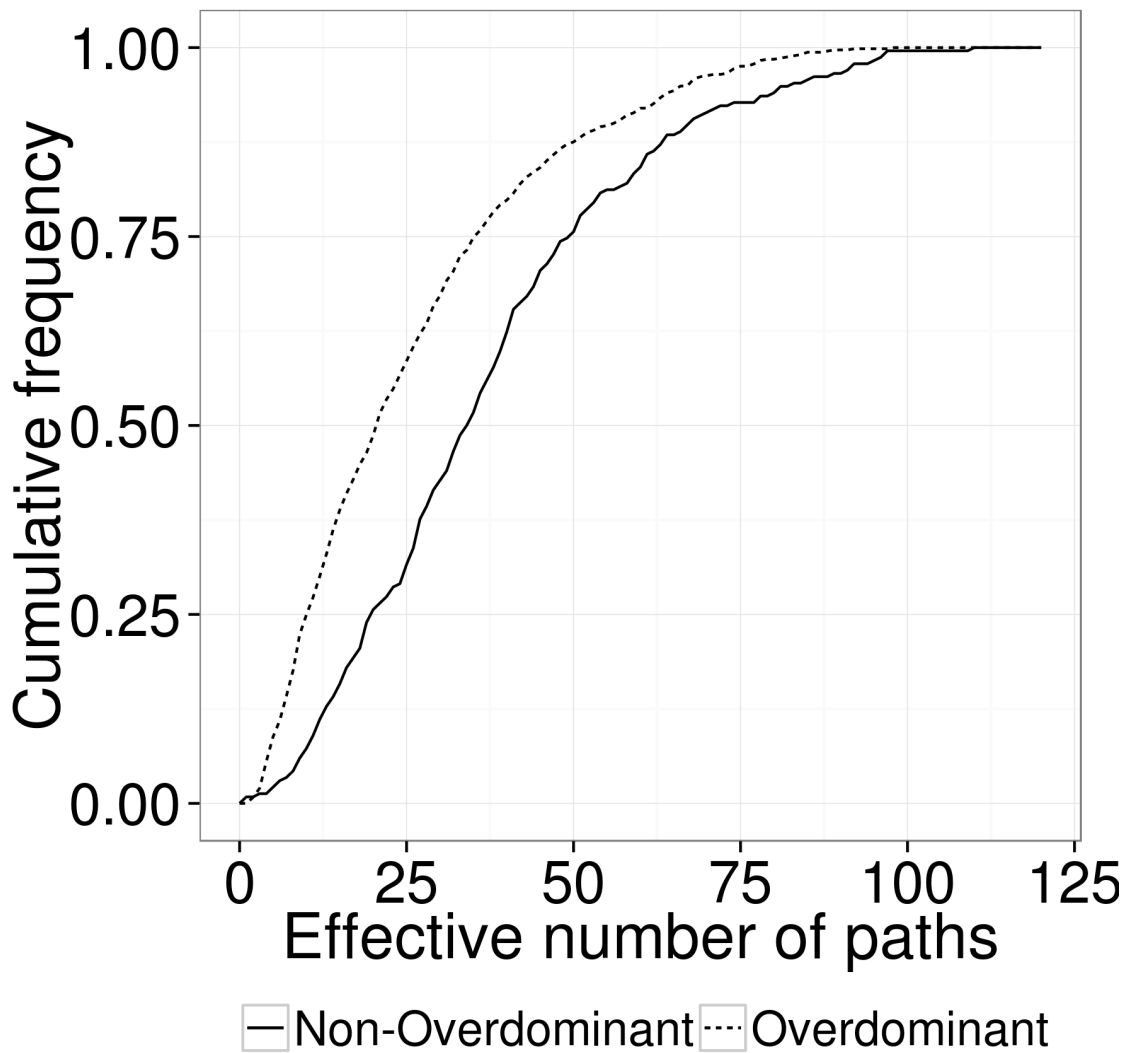

386

387 **Figure S8.** Similar to Figure 3 but for simulations in two dimensions close to the  
 388 optimum (Kolmogorov-Smirnov  $p = 10^{-10}$ )

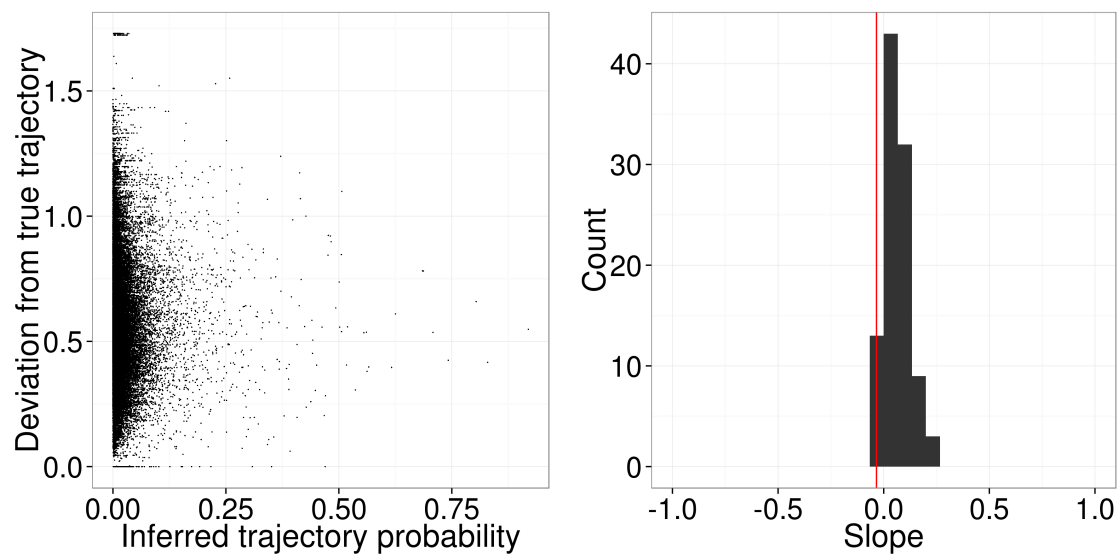

389

390 **Figure S9.** Similar to Figure 4 but for simulations in two dimensions close to the  
 391 optimum (slope =  $-0.03$ , empirical  $p = 0.02$ )

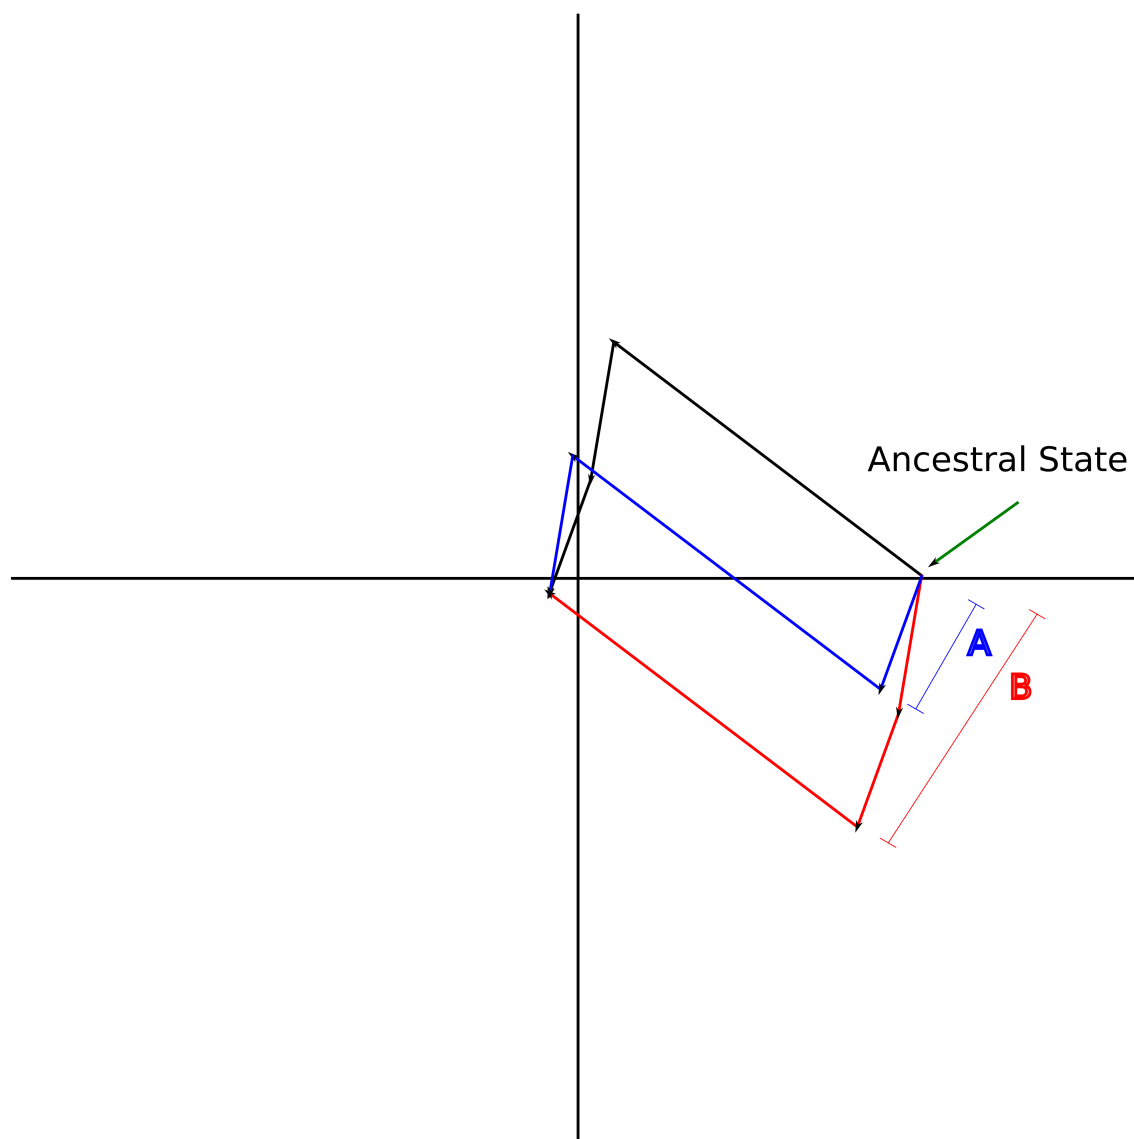

392

393 **Figure S10.** Cartoon of maximum phenotypic deviation calculation for a single adaptive  
 394 trajectory. Suppose the black lines correspond to the true adaptive trajectory of the  
 395 population, where three total mutations have occurred in succession (three black arrows).  
 396 Consider two alternative orders of these mutations, in blue and red, both of which clearly  
 397 deviate from the true adaptive trajectory in phenotype space. The distance **A** represents  
 398 the maximal phenotypic deviation of the blue trajectory from the true adaptive trajectory,  
 399 while the distance **B** represents the same thing for the red adaptive trajectory. This is  
 400 essentially the largest distance from any point in the alternative mutation order to the true  
 401 adaptive trajectory.

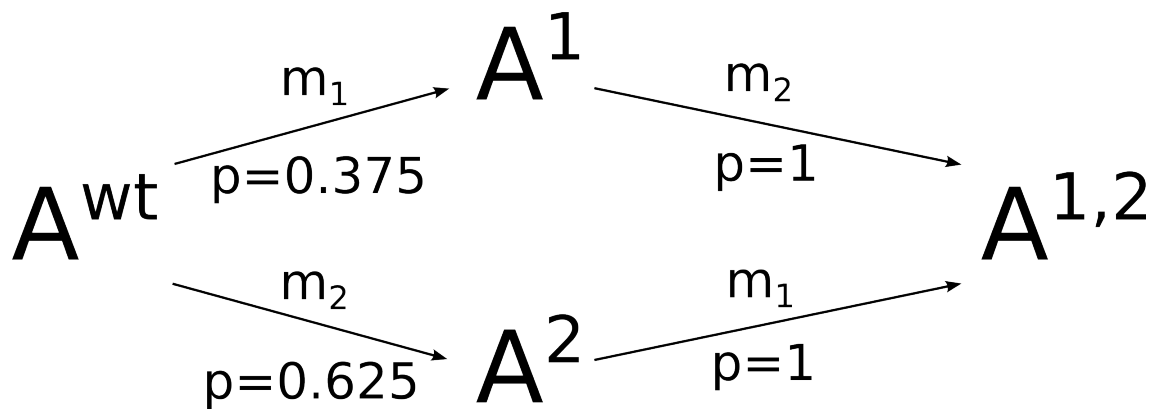

402

403 **Figure S11.** Along with table S1, representation of the FA method example in section  
 404 S2.6. Arrows represent transitions after the introduction of an available mutation into the  
 405 population, with the mutation above the arrow and the conditioned probability of the  
 406 mutation successfully being generated and invading the population below the arrow.

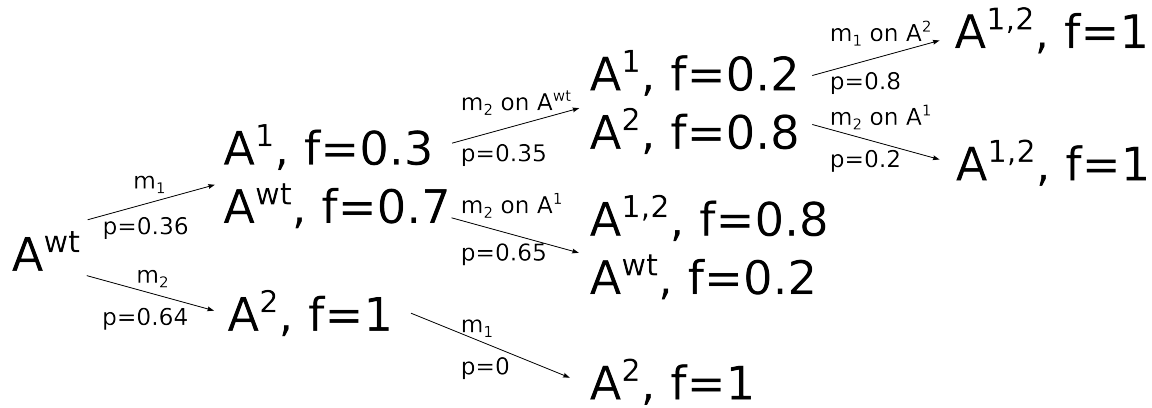

407

408 **Figure S12.** Along with table S2, representation of the PA method example in section  
 409 S2.6. Note that this example uses a different set of mutations than the example for the FA  
 410 method. Arrows represent transitions after the introduction of an available mutation into  
 411 the population, with the mutation above the arrow and the conditioned probability of the  
 412 mutation successfully being generated and invading the population below the arrow.  
 413 Successful mutations that result in a balanced polymorphism are represented by the  
 414 presence of multiple alleles each at some frequency (f).



## 415 Literature Cited

416 FISHER, R., 1930 *The genetical theory of natural selection*. Oxford at the Clarendon Press,  
417 Oxford, 1st edition.

418 HALDANE, J. B. S., 1927 A Mathematical Theory of Natural and Artificial Selection, Part  
419 V: Selection and Mutation. Mathematical Proceedings of the Cambridge Philosophical  
420 Society **23**: 838–844.

421 KIMURA, M., 1956 Rules for testing stability of a selective polymorphism. Proceedings of  
422 the National Academy of Sciences of . . . **1966**: 336–340.

423 KIMURA, M., 1962 On the probability of fixation of mutant genes in a population.  
424 Genetics .

425 KIMURA, M., and J. F. CROW, 1964 The number of alleles that can be maintained in a  
426 finite population. Genetics **49**: 725–738.

427 KINGMAN, J. F. C., 1961 A mathematical problem in population genetics. Mathematical  
428 Proceedings of the Cambridge Philosophical Society **57**: 574.

429 KOJIMA, K., 1959 Stable equilibria for the optimum model. Proceedings of the National  
430 Academy of Sciences of . . . **45**: 989–993.

431 LANDE, R., 1976 Natural selection and random genetic drift in phenotypic evolution.  
432 Evolution **30**: 314–334.

433 LOBKOVSKY, A. E., Y. I. WOLF, and E. V. KOONIN, 2011 Predictability of evolutionary  
434 trajectories in fitness landscapes. PLoS Computational Biology **7**: e1002302.

435 LOBKOVSKY, A. E., Y. I. WOLF, and E. V. KOONIN, 2013 Quantifying the similarity of  
436 monotonic trajectories in rough and smooth fitness landscapes. Molecular bioSystems .

437 MANDEL, S. P. H., 1959 The stability of a multiple allelic system. Heredity **13**: 289–302.

- 438 PALMER, M., A. MOUDGIL, and M. W. FELDMAN, 2013 Long-term evolution is  
439 surprisingly predictable in lattice proteins. *Journal of the Royal Society, Interface* **10**.
- 440 ROY, S. W., 2009 Probing evolutionary repeatability: neutral and double changes and the  
441 predictability of evolutionary adaptation. *PLoS ONE* **4**: e4500.
- 442 SELLIS, D., B. CALLAHAN, D. A. PETROV, and P. W. MESSER, 2011 Heterozygote  
443 advantage as a natural consequence of adaptation in diploids. *Proceedings of the*  
444 *National Academy of Sciences of the United States of America* **2011**: 1–6.
- 445 WEINREICH, D. M., N. F. DELANEY, M. A. DEPRISTO, and D. L. HARTL, 2006  
446 Darwinian evolution can follow only very few mutational paths to fitter proteins. *Science*  
447 **312**: 111–4.
- 448 WRIGHT, S., 1931 Evolution in mendelian populations. *Genetics* **16**: 97–159.
